# Supplementary material
Source: PubMed Central journal article supplement (PMC2276323)
Supplement: jbc_M707758200_1.pdf [file jbc_M707758200_1.pdf]

Supplemental Table 1

|                                           | Primer sequence                | Product size |
|-------------------------------------------|--------------------------------|--------------|
| <i>lpa</i> <sub>1</sub> RT-PCR sense      | ATGGCAGCTGCCTCTACTTCC          | 200 bp       |
| <i>lpa</i> <sub>1</sub> RT-PCR antisense  | CCACCATGACCAGGAGATTGG          |              |
| <i>lpa</i> <sub>1</sub> qRT-PCR sense     | TCTTCTGGGCCATTTTCAAC           | 349 bp       |
| <i>lpa</i> <sub>1</sub> qRT-PCR antisense | TGCCTGAAGGTGGCGCTCAT           |              |
| <i>lpa</i> <sub>2</sub> RT-PCR sense      | TCAGCCTAGTCAAGACGGTTG          | 189 bp       |
| <i>lpa</i> <sub>2</sub> RT-PCR antisense  | CATCTCGGCAGGAATATAACCAC        |              |
| <i>lpa</i> <sub>2</sub> qRT-PCR sense     | ACCACACTCAGCCTAGTCAAGAC        | 279 bp       |
| <i>lpa</i> <sub>2</sub> qRT-PCR antisense | CTGAGTAACGGGCAGACTTG           |              |
| <i>lpa</i> <sub>3</sub> RT-PCR sense      | ACACCAGTGGCTCCATCAG            | 200 bp       |
| <i>lpa</i> <sub>3</sub> RT-PCR antisense  | CTTACTGACGGAGTTGAGCAG          |              |
| <i>lpa</i> <sub>3</sub> qRT-PCR sense     | ACACCAGTGGCTCCATCAG            | 200 bp       |
| <i>lpa</i> <sub>3</sub> qRT-PCR antisense | GTTCATGACGGAGTTGAGCAG          |              |
| <i>lpa</i> <sub>4</sub> RT-PCR sense      | AGGCATGAGCACATTCTCTC           | 292 bp       |
| <i>lpa</i> <sub>4</sub> RT-PCR antisense  | CAACCTGGGTCTGAGACTTG           |              |
| <i>lpa</i> <sub>4</sub> qRT-PCR sense     | AGGCATGAGCACATTCTCTC           | 292 bp       |
| <i>lpa</i> <sub>4</sub> qRT-PCR antisense | CAACCTGGGTCTGAGACTTG           |              |
| <i>lpa</i> <sub>5</sub> RT-PCR sense      | AGGAAGAGCAACCGATCACAG          | 345 bp       |
| <i>lpa</i> <sub>5</sub> RT-PCR antisense  | ACCACCATATGCAAACGATGTG         |              |
| <i>lpa</i> <sub>5</sub> qRT-PCR sense     | AGGAAGAGCAACCGATCACAG          | 335 bp       |
| <i>lpa</i> <sub>5</sub> qRT-PCR antisense | ACCACCATATGCAAACGATGTG         |              |
| <i>gfap</i> RT-PCR sense                  | CTTTGCTAGCTACATCGAGAAGGTCCGCTT | 339 bp       |
| <i>gfap</i> RT-PCR antisense              | CGATTCAACCTTTCTCTCCAAATCCACACG |              |
| <i>β-actin</i> qRT-PCR sense              | AGCCTTCCTTCTTGGGTATG           | 158 bp       |
| <i>β-actin</i> qRT-PCR antisense          | CTTCTGCATCCTGTCAGCAA           |              |
